# Supplementary material for: An Origami Paper-Based Device Printed with DNAzyme-Containing DNA Superstructures for Escherichia coli Detection
Source: PubMed Central journal article supplement (PMC6722672; doi:10.3390/mi10080531), 2019-08-12
Supplement: micromachines-10-00531-s001.pdf [file micromachines-10-00531-s001.pdf]

# An Origami Paper-Based Device Printed with DNase-Containing DNA Superstructures for *Escherichia coli* Detection

Yating Sun <sup>1</sup>, Yangyang Chang <sup>1</sup>, Qiang Zhang <sup>2</sup> and Meng Liu <sup>1,\*</sup>

<sup>1</sup> School of Environmental Science and Technology, Key Laboratory of Industrial Ecology and Environmental Engineering (Ministry of Education), Dalian University of Technology, 116024 Dalian, China

<sup>2</sup> School of Bioengineering, Dalian University of Technology, 116024 Dalian, China

\* Correspondence: mliu@dlut.edu.cn

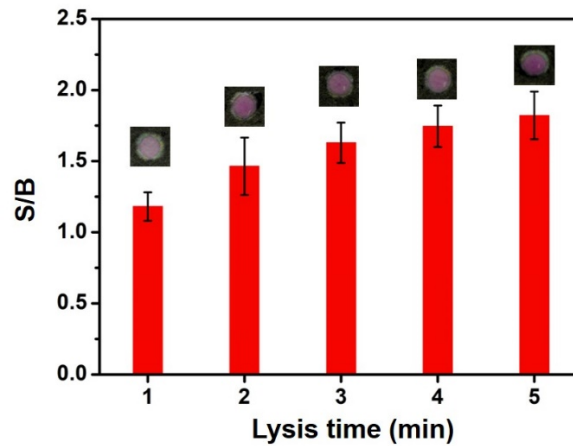

Figure S1. Determination of optimal lysing time on paper.
